# Supplementary material
Source: publisher figshare collection journal article supplement (https://karger.figshare.com/ndownloader/files/30806767)
Supplement: Supplementary file 1 [file 30806767]

**Supplementary Table 5. Multivariable logistic regressions of functional assessments related to PIM use in the overall study population**

| Assessment | Odds ratio | Confidence interval 95% | N | P-value |
| --- | --- | --- | --- | --- |
| Timed “Up & Go” | 1.01 | 0.92 – 1.11 | 943 | 0.854 |
| Walking speed test, 4m | 0.95 | 0.68 – 1.33 | 389 | 0.772 |
| Handgrip strength, max. | 1.00 | 0.97 – 1.03 | 953 | 0.880 |
| Falls in the past 12 months | 1.53 | 1.08 – 2.17 | 928 | 0.016* |
| Fried Frailty Score | 1.68 | 1.17 – 2.41 | 891 | 0.005* |
| Mini Nutritional Assessment (MNA) | 0.88 | 0.81 – 0.97 | 932 | 0.008* |
| Mini Mental State Examination (MMSE) | 1.12 | 0.97 – 1.29 | 940 | 0.124 |
| Digit-Symbol Substitution test (DSST) | 1.01 | 0.99 – 1.03 | 822 | 0.499 |
| Clock drawing test (Shulman) | 1.17 | 0.83 – 1.66 | 911 | 0.364 |
| CES-D Scale | 2.12 | 1.32 – 3.41 | 934 | 0.002* |

Notes and abbreviations; Logistic regressions were performed separately for each assessment including age, sex, number of regular medications, morbidity index and years of education as covariates.

CES-D Scale, Center for Epidemiologic Studies Depression Scale
